# Supplementary material for: Perception and Barriers to Indoor Air Quality and Perceived Impact on Respiratory Health: An Assessment in Rural Honduras
Source: Hindawi journal article supplement (doi:10.1155/2014/105260), 2014-01-01
Supplement: f1 [file 105260.f1.pdf]

APPENDIX A – Needs assessment survey

VCU Internal Medicine Global Health & Health Disparities Program

Yoro, Honduras

Indoor Air Quality Needs Assessment Survey

Date: \_\_\_\_\_

Home site/village: \_\_\_\_\_

- |                 |                 |                  |
|-----------------|-----------------|------------------|
| a. El Portillo  | g. Agua Sarca   | m. Puerto Rico   |
| b. San Felix    | h. Chorroviento | n. Agua Caliente |
| c. La Esperanza | i. La Culata    | o. La Vega       |
| d. La Florida   | j. La Hicaca    | p. El Cerro      |
| e. Santa Maria  | k. Lomitas      | q. La Lima       |
| f. Crucete      | l. El Urraco    | r. Other: _____  |

**Section I: Characteristics of House**

- 1) What construction material was used for your kitchen roof?
  - a. Tile
  - b. Thatched
  - c. Concrete
  - d. Iron
  - e. Other: \_\_\_\_\_
- 2) What construction material was used for your kitchen walls?
  - a. Brick
  - b. Thatched
  - c. Concrete
  - d. Iron
  - e. Wood
  - f. Mud
  - g. Other: \_\_\_\_\_
- 3) What construction material was used for your kitchen floor?
  - a. Concrete
  - b. Brick
  - c. Wood
  - d. Mud
  - e. Bamboo
  - f. Other: \_\_\_\_\_
- 4) Location of kitchen (please see attached diagram)
- 5) Number of walls in kitchen: \_\_\_\_\_
- 6) Number of windows in the kitchen: \_\_\_\_\_
- 7) Number of doors in the kitchen: \_\_\_\_\_
- 8) What type of stove do you use?
  - a. Gas
  - b. Electric

- c. Kerosene
  - d. Mud
  - e. Other: \_\_\_\_\_
- 9) What type of fuel do you use?
- a. Firewood
  - b. Sawdust
  - c. Straw
  - d. Manure
  - e. Charcoal
  - f. Kerosene
  - g. Gas
  - h. Electricity
  - i. Other: \_\_\_\_\_
- 10) Does your house have a chimney? (Y/N): \_\_\_\_\_
- 11) What construction material is your stove made from?
- a. Iron
  - b. Mud
  - c. Brick
  - d. Cement & sand
  - e. Other: \_\_\_\_\_
- 12) How do you dispose of your trash?
- a. Burn trash within household
  - b. Burn trash outside of household
  - c. Dispose of trash away from household
  - d. Other: \_\_\_\_\_

## Section II: Health Effects

- 1) Total number of people living in your household: \_\_\_\_\_
- 2) How many people in your household smoke tobacco? \_\_\_\_\_
- 3) How many members of your household are currently being treated for any respiratory problems? (Y/N): \_\_\_\_\_
- 4) Does smoke in your home cause you to have watery eyes? (Y/N): \_\_\_\_\_
- 5) If yes to Question 4, how bad is the problem?
  - a. Need to close eyes
  - b. Need to splash water in eyes
  - c. Need to wipe eyes
  - d. Other: \_\_\_\_\_

6) Did any family members cough during the past two weeks? (Y/N): \_\_\_\_\_

7) If yes to Question 6:

| Household member (ie. mother, father, spouse, etc.) | Severity of coughing:<br>1 = Mild<br>2 = Moderate<br>3 = Severe | Frequency of coughing:<br>1 = Rarely<br>2 = Sometimes<br>3 = Frequently |
|-----------------------------------------------------|-----------------------------------------------------------------|-------------------------------------------------------------------------|
|                                                     |                                                                 |                                                                         |
|                                                     |                                                                 |                                                                         |
|                                                     |                                                                 |                                                                         |
|                                                     |                                                                 |                                                                         |
|                                                     |                                                                 |                                                                         |

8) Does anyone in your family have difficulty breathing? (Y/N): \_\_\_\_\_

9) If yes to Question 8:

| Household member (ie. mother, father, spouse, etc.) | Level of breathing difficulty:<br>1 = Sometimes have trouble<br>2 = Regularly have trouble, but gets better<br>3 = Regularly have trouble, does not get better |
|-----------------------------------------------------|----------------------------------------------------------------------------------------------------------------------------------------------------------------|
|                                                     |                                                                                                                                                                |
|                                                     |                                                                                                                                                                |
|                                                     |                                                                                                                                                                |
|                                                     |                                                                                                                                                                |
|                                                     |                                                                                                                                                                |

10) Have any household members died within the last five years due to respiratory problems?  
(Y/N): \_\_\_\_\_

| Household member (ie. mother, father, spouse, etc.) | Age at death: |
|-----------------------------------------------------|---------------|
|                                                     |               |
|                                                     |               |
|                                                     |               |
|                                                     |               |

11) How much of a problem is the quality of air in your home?

- Not a problem, does not affect my daily life
- A minor problem that somewhat affects my daily life
- A major problem that inhibits my daily life
- Not sure

Diagram: Location of kitchen (see Section I, Question 4)

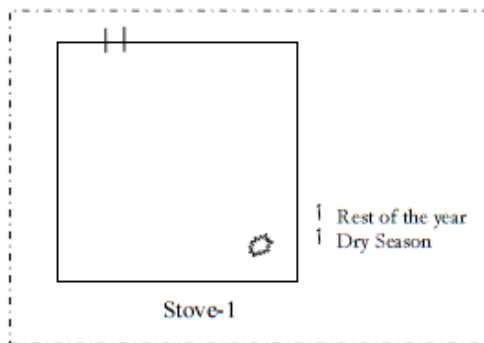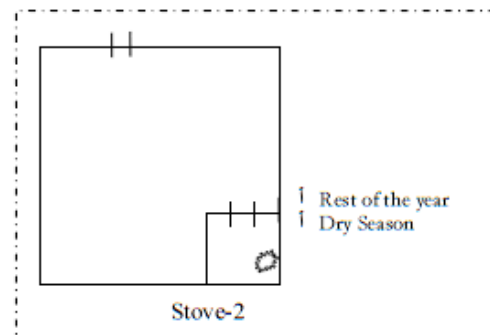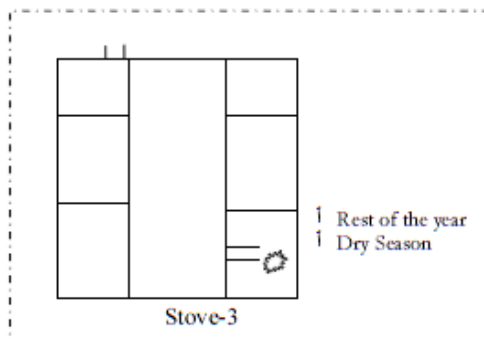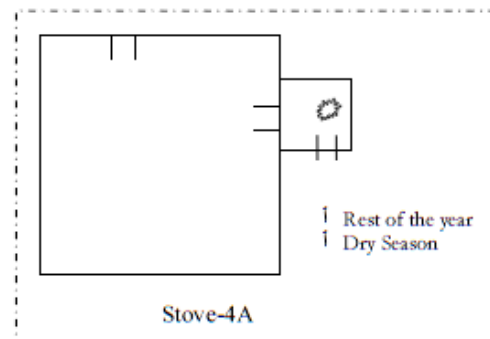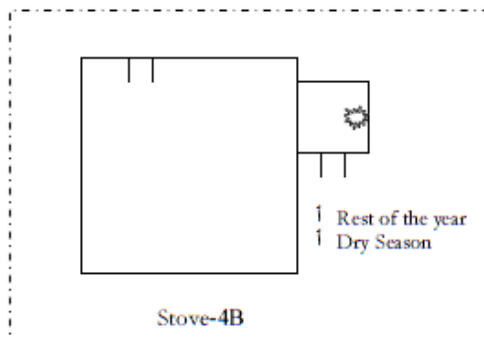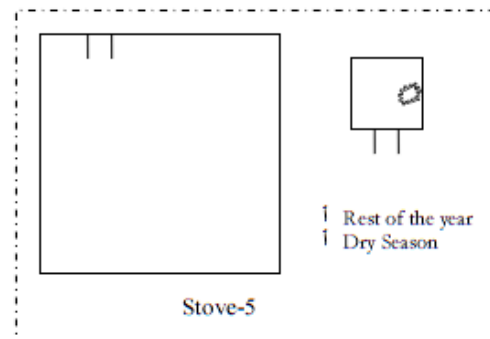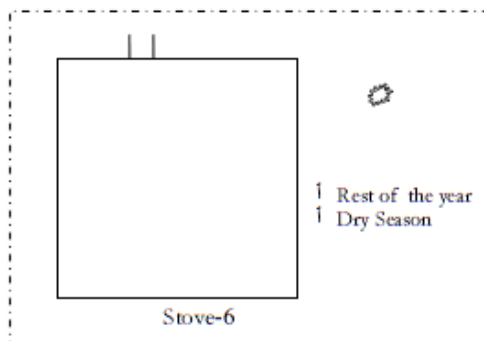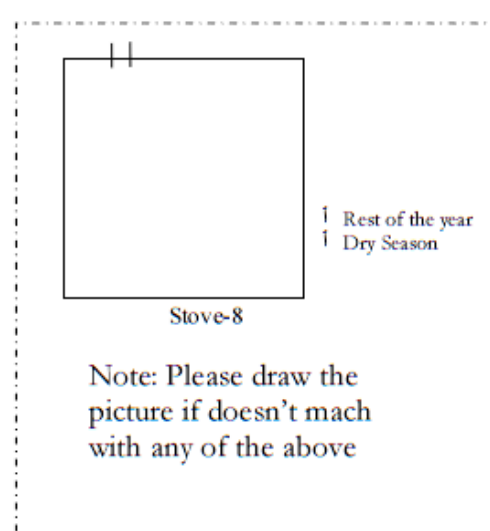

Appendix A-II: Survey in Spanish

Programa de Disparidades de Salud y Salud Global de VCU Medicina Interna

Yoro, Honduras

Encuesta de Evaluación de Necesidades sobre Calidad del Aire Interior

Fecha: \_\_\_\_\_

Pueblo natal: \_\_\_\_\_

- |                 |                 |                   |
|-----------------|-----------------|-------------------|
| s. El Portillo  | y. Agua Sarca   | ee. Puerto Rico   |
| t. San Felix    | z. Chorroviento | ff. Agua Caliente |
| u. La Esperanza | aa. La Culata   | gg. La Vega       |
| v. La Florida   | bb. La Hicaca   | hh. El Cerro      |
| w. Santa Maria  | cc. Lomitas     | ii. La Lima       |
| x. Crucete      | dd. El Urraco   | jj. Other: _____  |

**Sección I: Características de la Casa**

13) ¿Que material de construcción fue utilizada para el techo de su cocina?

- |             |                |
|-------------|----------------|
| a. Teja     | d. Hierro      |
| b. Paja     | e. Otro: _____ |
| c. Concreto |                |

14) ¿Que material de construcción fue utilizada para las paredes de su cocina?

- |             |                |
|-------------|----------------|
| a. Ladrillo | e. Madera      |
| b. Paja     | f. Lodo        |
| c. Concreto | g. Otro: _____ |
| d. Hierro   |                |

15) ¿Que material de construcción fue utilizada para el piso de su cocina?

- |             |                |
|-------------|----------------|
| a. Concreto | d. Lodo        |
| b. Ladrillo | e. Bambú       |
| c. Madera   | f. Otro: _____ |

16) Ubicación de la cocina (por favor vea diagrama adjunto)

17) Numero de paredes en la cocina: \_\_\_\_\_

18) Numero de ventanas en la cocina: \_\_\_\_\_

19) Numero de puertas en la cocina: \_\_\_\_\_

20) ¿Que tipo de estufa usa?

- |              |              |
|--------------|--------------|
| a. Gas       | c. Queroseno |
| b. Eléctrico | d. Lodo      |

- e. Otro: \_\_\_\_\_
- 21) ¿Que tipo de combustible usa?
- |            |              |                 |
|------------|--------------|-----------------|
| a. Lena    | d. Estiércol | g. Gas          |
| b. Aserrín | e. Carbón    | h. Electricidad |
| c. Paja    | f. Queroseno | i. Otro: _____  |
- 22) ¿Tiene su casa una chimenea? (S/N): \_\_\_\_\_
- 23) ¿De que material fue construida su estufa?
- |             |                    |
|-------------|--------------------|
| a. Hierro   | d. Cemento & arena |
| b. Lodo     | e. Otro: _____     |
| c. Ladrillo |                    |
- 24) ¿Cómo dispone usted de su basura?
- |                                    |                                     |
|------------------------------------|-------------------------------------|
| a. Quemar basura dentro de la casa | c. Disponer de basura lejos de casa |
| b. Quemar basura fuera de la casa  | d. Otro: _____                      |

## Sección II: Efectos de Salud

- 12) Numero total de personas que viven en su casa: \_\_\_\_\_
- 13) ¿Cuántas personas en su casa fuman tabaco? \_\_\_\_\_
- 14) ¿Cuántas personas en su casa están siendo actualmente tratados por algún problema respiratorio? (S/N): \_\_\_\_\_
- 15) ¿Es que el humo en su casa le causa que tenga ojos acuosos? (S/N): \_\_\_\_\_
- 16) Si si a la pregunta 4, ¿como de grave es el problema?
- |                                           |                                  |
|-------------------------------------------|----------------------------------|
| a. Necesidad de cerrar los ojos           | c. Necesidad de limpiar los ojos |
| b. Necesidad de salpicar agua en los ojos | d. Otro: _____                   |
- 17) ¿Ha tosido algún miembro familiar en las ultimas dos semanas? (S/N): \_\_\_\_\_
- 18) Si si a la pregunta 6:

| Miembro de la Casa (Ej., madre, padre, esposo, etc.) | Gravedad de la tos:<br>1 = Leve<br>2 = Moderado<br>3 = Severo | Frecuencia de la tos:<br>1 = Raramente<br>2 = A veces<br>3 = Frecuentemente |
|------------------------------------------------------|---------------------------------------------------------------|-----------------------------------------------------------------------------|
|                                                      |                                                               |                                                                             |
|                                                      |                                                               |                                                                             |
|                                                      |                                                               |                                                                             |
|                                                      |                                                               |                                                                             |
|                                                      |                                                               |                                                                             |

- 19) ¿Hay alguien en su familia que tiene dificultad con respirar? (S/N): \_\_\_\_\_

20) Si si a la pregunta 8:

| Miembro de la Casa (Ej., madre, padre, esposo, etc.) | Nivel de dificultad con respirar:<br>1 = A veces tiene dificultad<br>2 = Regularmente tiene dificultad, se mejora<br>3 = Regularmente tiene dificultad, no se mejora |
|------------------------------------------------------|----------------------------------------------------------------------------------------------------------------------------------------------------------------------|
|                                                      |                                                                                                                                                                      |
|                                                      |                                                                                                                                                                      |
|                                                      |                                                                                                                                                                      |
|                                                      |                                                                                                                                                                      |
|                                                      |                                                                                                                                                                      |

21) ¿Han muerto algunos miembros de la casa dentro de los últimos cinco años por problemas respiratorios? (S/N): \_\_\_\_\_

| Miembro de la Casa (Ej., madre, padre, esposo, etc.) | Edad al morir: |
|------------------------------------------------------|----------------|
|                                                      |                |
|                                                      |                |
|                                                      |                |
|                                                      |                |

22) ¿Cuánto de un problema es la calidad de aire en su hogar?

- Ningún problema, no afecta mi vida diaria
- Un problema menor que levemente afecta mi vida diaria
- Un problema mayor que impide mi vida diaria
- Inseguro/a

Diagrama: Ubicación de la cocina (ver Sección 1, Pregunta 4)

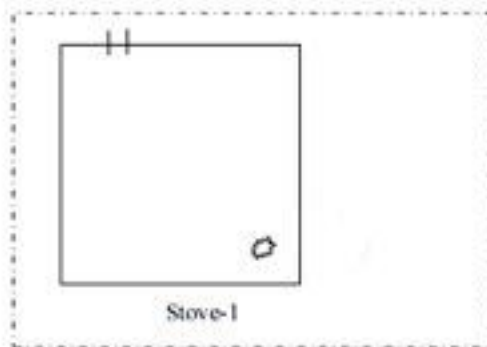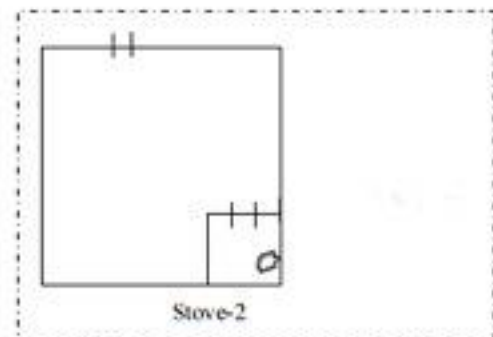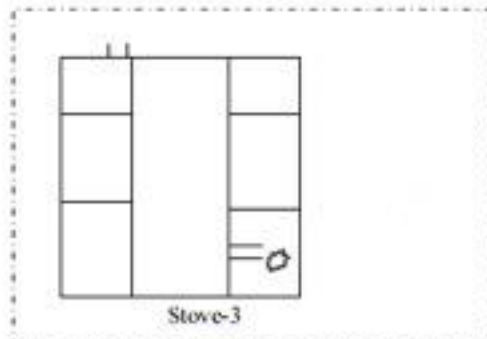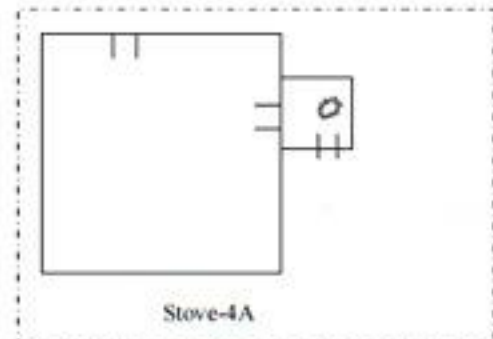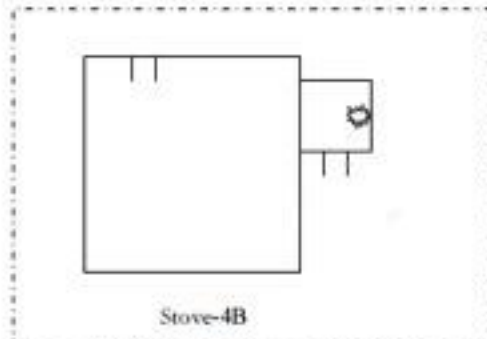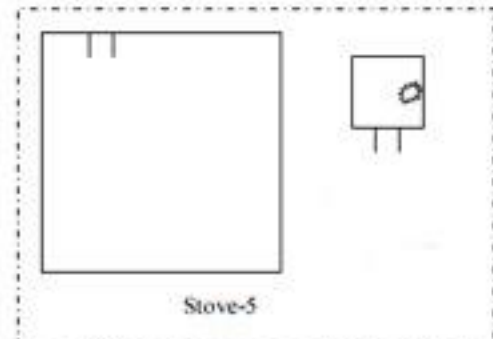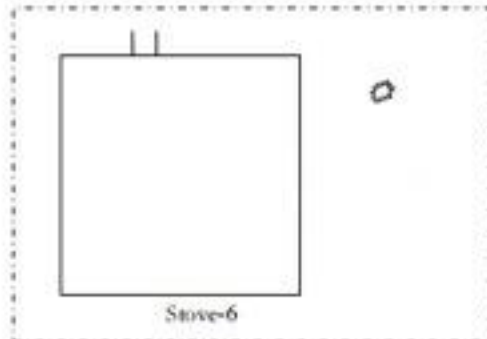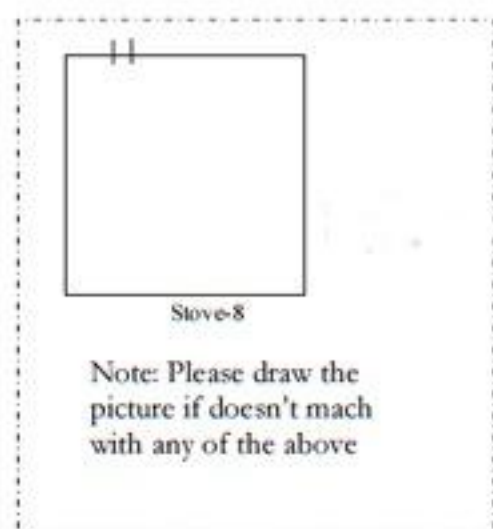



#### Appendix A-III: Introduction Script in English

Hello, I'm [name]. We are conducting a survey about indoor air quality as part of a research study. Your participation is completely voluntary. The medical care you receive here will not be affected in any way if you do or do not participate in the survey. This survey is anonymous. You don't have to answer any question you don't want to answer and you can stop at any time. It will probably take between 10 and 20 minutes.

#### Appendix A-IV: Introduction Script in Spanish

Hola, soy [nombre]. Estamos tomando una encuesta sobre la calidad de aire como parte de una investigación. Su participación es completamente voluntario. El cuidado médico que usted recibe aquí no será afectado de ninguna manera si participa o no en la encuesta. La encuesta es anónima. No tiene que responder a cualquier pregunta a la que no quiera responder y puede parar en cualquier momento. Le tomara entre 10 y 20 minutos completarla.

APPENDIX B. Supplemental materials.

**Table B-1. Reported number of household members treated for respiratory problems amongst those with indoor, outdoor, and attached stove locations, stratified by presence of chimney.**

|            | INDOOR STOVE |    | OUTDOOR STOVE |    | ATTACHED STOVE |    |
|------------|--------------|----|---------------|----|----------------|----|
|            | YES          | NO | YES           | NO | YES            | NO |
| No Chimney | 2            | 2  | 1             | 4  | 2              | 5  |
| Chimney    | 7            | 18 | 6             | 5  | 2              | 22 |
| P-value    | 0.06         |    |               |    |                |    |

**Image 1. Traditional indoor stove.**

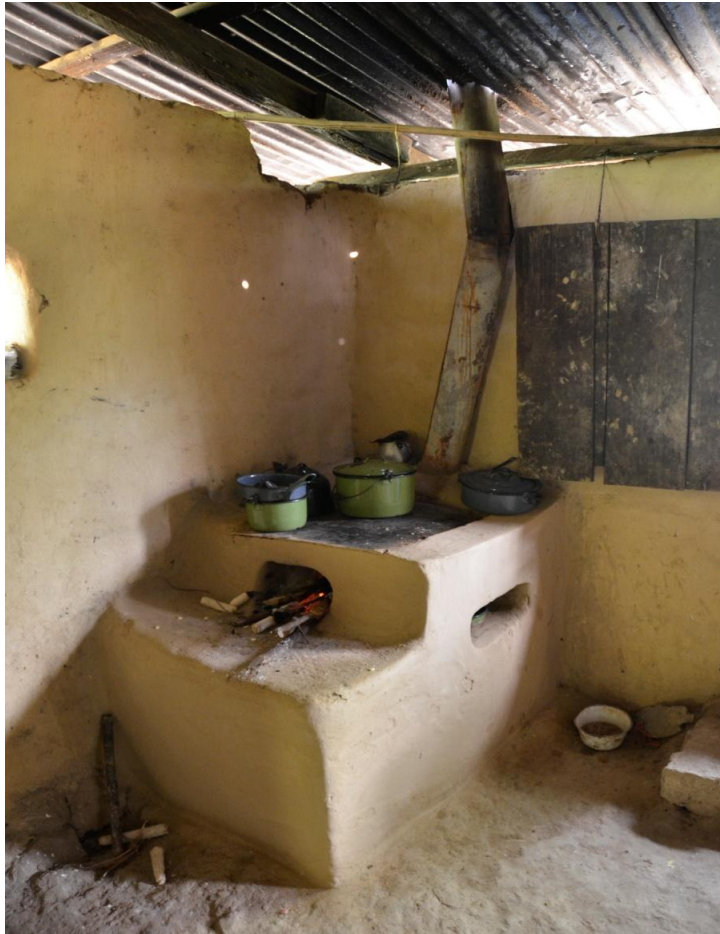

A traditional adobe stove within a home in the village of La Hicaca, Yoro. Of note is the improper installment of the chimney, with a large gap between the chimney and the stove.
